# Supplementary material for: Memory complaints and depressive symptoms over time: a construct-level replication analysis
Source: BMC Geriatr. 2020 Mar 2;20:57. doi: 10.1186/s12877-020-1451-1 (PMC7050122; doi:10.1186/s12877-020-1451-1)
Supplement: Supplementary file 1 — Additional file 1: Table S1. NHATS: Baseline Mean Level Differences in Key Study Variables by Participants’ Age, Sex, Education, Race, Income, and Marital Status. [file 12877_2020_1451_MOESM1_ESM.docx]

**Supplementary Table**

Table 1. *NHATS*: *Baseline Mean Level Differences in Key Study Variables by Participants’ Age, Sex, Education, Race, Income, and Marital Status.*

|  | **Total Sample** | **Self-Rated Present Memory** | **Perceived two-year memory decline (Yes)** | **Depressive Symptoms** |
| --- | --- | --- | --- | --- |
| [%(n)] | [M(SD)] | [%(n)] | [M(SD)] |
| **Age differences** |  |  |  |  |
| 65-691 | 28.35 (1437) | 2.38 (0.92)4,5 | 8.84 (127) | 2.82 (1.29) |
| 70-742 | 25.55 (1295) | 2.41 (0.90) | 8.73 (113) | 2.74 (1.21) |
| 75-793 | 19.39 (983) | 2.50 (0.89) | 9.87 (97) | 2.75 (1.14) |
| 80-844 | 15.58 (790) | 2.52 (0.91)1 | 8.23 (65) | 2.71 (1.13) |
| 85-895 | 7.40 (375) | 2.56 (0.94)1 | 12.53 (47) | 2.78 (1.27) |
| 90+6 | 3.73 (189) | 2.60 (0.89) | 11.64 (22) | 2.66 (1.09) |
| Significance Test |  | *F* (5) = 5.86 | χ2(5) = 8.20 | *F* (5) = 1.32 |
|  |  | *p* < .001, *η2 =* .01 | *p* = 0.14 | *p* = 0.25, *η2 =* .00 |
| **Sex differences** |  |  |  |  |
| Female | 63.64 (3226) | 2.47 (0.88) | 9.49 (306) | 2.82 (1.24) |
| Maleref | 36.36 (1843) | 2.43 (0.95) | 8.95 (165) | 2.66 (1.16) |
| Significance Test |  | *Z = -2.30* | χ2(1) = 0.40 | *Z = - 5.84* |
|  |  | *p = 0.02, d = 0.05* | *p* = .53 | *p* < .001, d = 0.14 |
| **Education** |  |  |  |  |
| Less than High School1 | 13.03 (660) | 2.692,3 (0.97) | 10.15 (67) | 3.062,3 (1.45) |
| High School2 | 28.44 (1441) | 2.561,3 (0.90) | 9.16 (28.03) | 2.891,3 (1.28) |
| More than High School3 | 58.54 (2966) | 2.351,2 (0.89) | 9.17 (272) | 2.631,2 (1.09) |
|  |  |  |  |  |
| Significance Test |  | *F*(2,5061) = 51.05, | χ2(2 = 0.66, | *F*(2,5043) = 46.17, |
| *p* <.001, *η*2 = .02 | *p* = .72 | *p* <.001, *η*2 = .02 |
| **Race differences** |  |  |  |  |
| White | 78.77 (3993) | 2.40 (0.89) | 8.84 (353) | 2.70 (1.16) |
| Black | 21.23 (1076) | 2.66 (0.96) | 10.97 (118) | 2.98 (1.35) |
| Significance Test |  | *Z = 8.13* | χ2(1) = 4.55 | *Z = 6.53* |
|  |  | *p < .001, d = 0.29* | *p* = .03 | *p < .001, d = 0.22* |
| **Income level differences** |  |  |  |  |
| Below $15,0001 | 51.77 (2624) | 2.54 (0.93)3,4 | 10.63 (279) | 2.83 (1.26)4 |
| $15,000- $30,0002 | 13.55 (687) | 2.56 (0.92)3,4 | 8.15 (56) | 2.92 (1.33)3,4 |
| $30,000-$60,0003 | 16.95 (859) | 2.37 (0.87)1,2,4 | 7.33 (63) | 2.70 (1.16)2,4 |
| >$60,0004 | 17.74 (899) | 2.21 (0.84)1,2,3 | 8.12 (73) | 2.48 (0.92)1,2,3 |
| Significance Test |  | *F*(3,5062) = 36.21, | χ2(3) = 12.03, | *F*(3, 5044) = 24.54, |
| *p* <.001, *η*2 = .02 | *p* = .007 | *p* < .001, *η*2 =.01 |
| **Marital Status Differences** |  |  |  |  |
| Married/Partnered | 48.08 (2436) | 2.36 (0.88) | 8.42 (205) | 2.61 (1.08) |
| Separated/Divorced/Never Married | 51.92 (2631) | 2.54 (0.93) | 10.07 (265) | 2.90 (1.31) |
| Significance Test |  | *Z =* -7.25 | χ2(1) = 4.13 | *Z* = -8.97 |
|  |  | *p* < .001, *d* = 0.20 | *p* = .04 | *p* < .001, *d* = 0.25 |

*Note.* Superscripts represent group differences at  *p* < .01.
